# Supplementary material for: Electrochemical Comparison of 2D-Flexible Solid-State Supercapacitors Based on a Matrix of PVA/H3PO4
Source: Polymers (Basel). 2023 Oct 10;15(20):4036. doi: 10.3390/polym15204036 (PMC10610347; doi:10.3390/polym15204036)
Supplement: Supplementary file 1 [file polymers-15-04036-s001.zip › polymers-2640722-supplementary.pdf]

# Electrochemical Comparison of 2D-Flexible Solid-State Supercapacitors Based on a Matrix of PVA/H<sub>3</sub>PO<sub>4</sub>

Bianca K. Muñoz \*, Andrés González-Banciella, Daniel Ureña, María Sánchez \* and Alejandro Ureña

| Figure           |                                                                                  | Page |
|------------------|----------------------------------------------------------------------------------|------|
| <b>Figure S1</b> | EIS analyses of the FSCs. CuO (Blue), CAG (Black) and LIG (Green)                | 2    |
| <b>Figure S2</b> | % Capacitance retention before, during and after bending for the FSCs analyzed   | 2    |
| <b>Figure S3</b> | GCD tests for the samples FSC-CAG/FP/CAG (a and c) and FSC-CAG/WGF/CAG (b and d) | 3    |
| <b>Figure S4</b> | GCD tests for the doubled FSC CAG/WGF/CAG/CAG/WCF/CAG at different scan rates    | 3    |

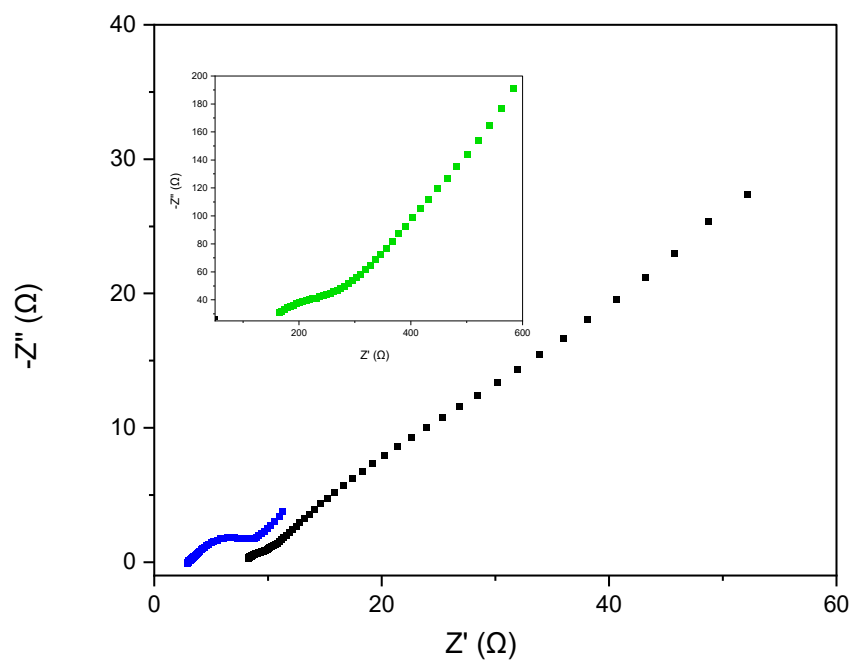

**Figure S1.** EIS analyses of the FSCs. CuO (Blue), CAG (Black) and LIG (Green)

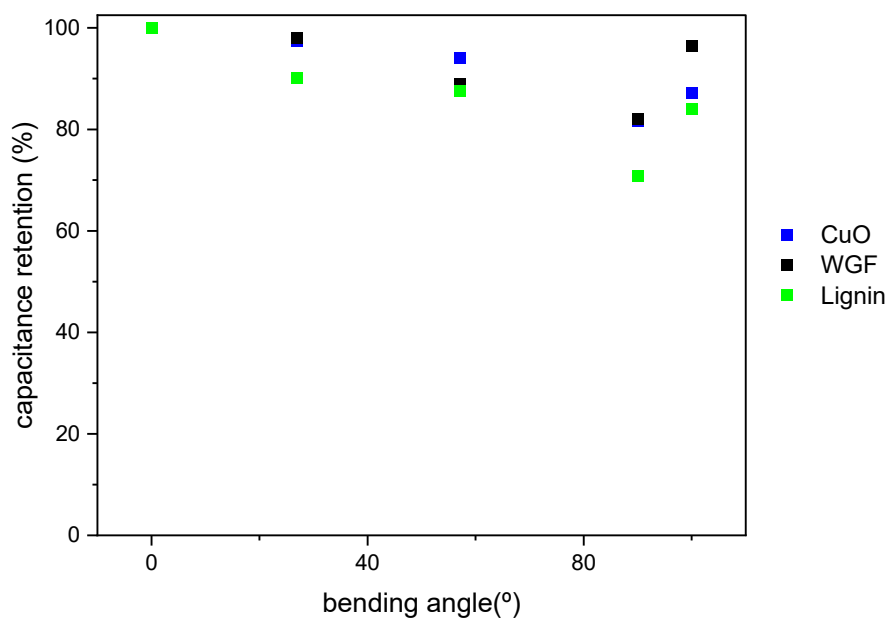

**Figure S2.** % Capacitance retention before, during and after bending for the FSCs analyzed.

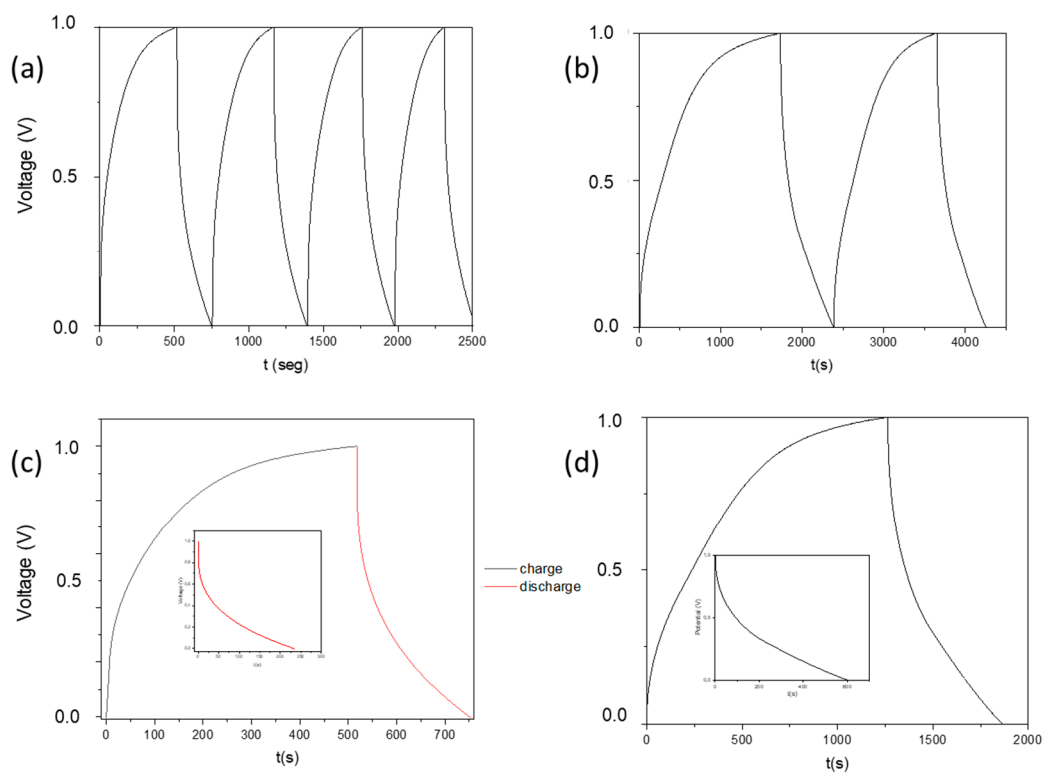

**Figure S3.** GCD tests for the samples FSC-CAG/FP/CAG (a and c) and FSC-CAG/WGF/CAG (b and d) at  $0.002 \text{ A g}^{-1}$

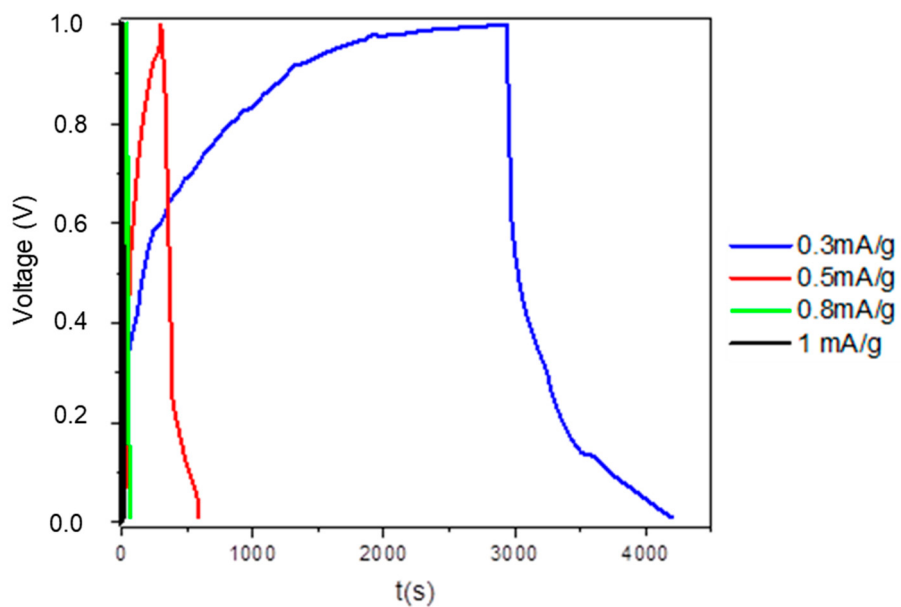

**Figure S4.** GCD tests for the double FSC-CAG/WGF/CAG at different scan rates
